# Supplementary material for: Best Practices for Assessing and Managing Bycatch of Marine Mammals
Source: Frontiers journal article supplement (doi:10.3389/fmars.2021.757330), 2021-11-17
Supplement: Data_Sheet_2.xlsx [file Data_Sheet_2.xlsx]

## Sheet: SAR Table
Supplemental Table 2
Taxa Group	Scientific Name	Taxa	Stock	Survey Type (categories from flow chart)	Second survey type (when combined)	Notes	Citation	Citation Full
Cetacean - dolphin	Delphinus capensis	Long-Beaked Common Dolphin	California Stock	Ship or boat line-transect survey			Barlow 2016	Barlow, J. 2016. Cetacean abundance in the California current estimated from ship-based line-transect surveys in 1991-2014. Southwest Fisheries Science Center, Administrative Report, LJ-2016-01. 63 p.Becker, E.A., K.A. Forney, M.C. Ferguson, J. Barlow, J.V. Redfern. 2012. Predictive Modeling of Cetacean Densities in the California Current Ecosystem based on Summer/Fall Ship Surveys in 1991- 2008.…
Cetacean - dolphin	Delphinus delphis	Common Dolphin	Western North Atlantic	Ship or boat line-transect survey	Aerial line-transect survey		Lawson and Gosselin 2018, Garrison 2020, Palka 2020	Lawson J, and J-F. Gosselin 2018 Estimates of cetacean abundance from the 2016 NAISS aerial surveys of eastern Canadian waters, with a comparison to estimates from the 2007 TNASS NAAMCO SC/25/AE/09 40; Garrison, L.P. and L. Stokes. 2020. Estimated bycatch of marine mammals and sea turtles in the U.S. Atlantic pelagic longline fleet during 2017. SEFSC PRBD. PRD Contribution. # PRBD-2020-05. 61; Pa…
Cetacean - dolphin	Delphinus delphis	Short-Beaked Common Dolphin	California/Oregon/Washington Stock	Ship or boat line-transect survey			Barlow 2016	Barlow, J. 2016. Cetacean abundance in the California current estimated from ship-based line-transect surveys in 1991-2014. Southwest Fisheries Science Center, Administrative Report, LJ-2016-01. 63 p.Becker, E.A., K.A. Forney, M.C. Ferguson, J. Barlow, J.V. Redfern. 2012. Predictive Modeling of Cetacean Densities in the California Current Ecosystem based on Summer/Fall Ship Surveys in 1991- 2008.…
Cetacean - dolphin	Delphinus delphis	Short-Beaked Common Dolphin	Western North Atlantic	Ship or boat line-transect survey	Aerial line-transect survey		Palka 2012
Cetacean - dolphin	Grampus griseus	Risso's Dolphin	California/Oregon/Washington stock	Ship or boat line-transect survey			Barlow 2016	Barlow, J. 2016. Cetacean abundance in the California current estimated from ship-based line-transect surveys in 1991-2014. Southwest Fisheries Science Center, Administrative Report, LJ-2016-01. 63 p.Becker, E.A., K.A. Forney, M.C. Ferguson, J. Barlow, J.V. Redfern. 2012. Predictive Modeling of Cetacean Densities in the California Current Ecosystem based on Summer/Fall Ship Surveys in 1991- 2008.…
Cetacean - dolphin	Grampus griseus	Risso's Dolphin	Gulf of Mexico Stock	Ship or boat line-transect survey			Not listed in SAR
Cetacean - dolphin	Grampus griseus	Risso's Dolphin	Hawaii Stock	Ship or boat line-transect survey			Bradford et al. 2017	Bradford, A.L., K.A. Forney, J. E.M. Oleson, J. Barlow. 2017. Abundance estimates of cetaceans from a line-transect survey within the U.S Hawaiian Islands Exclusive Economic Zone. Fishery Bulletin 115: 129-142.
Cetacean - dolphin	Grampus griseus	Risso's Dolphin	Western North Atlantic	Ship or boat line-transect survey			Garrison 2020, Palka 2022	Garrison, L.P. 2020. Abundance of cetaceans along the southeast U.S. east coast from a summer 2016 vessel survey. Southeast Fisheries Science Center, Protected Resources and Biodiversity Division, 75 Virginia Beach Dr., Miami, FL 33140. PRD Contribution # PRD-2020-04, 17 pp. Palka, D. 2020. Cetacean abundance estimates in US northwestern Atlantic Ocean waters from summer 2016 line transect survey…
Cetacean - dolphin	Lagenodelphis hosei	Fraser’s Dolphin	Gulf of Mexico Stock	NA
Cetacean - dolphin	Lagenodelphis hosei	Fraser’s Dolphin	Western North Atlantic	NA
Cetacean - dolphin	Lagenodelphis hosei	Fraser’s Dolphin	Hawaii Stock	Ship or boat line-transect survey			Bradford et al. 2017	Bradford, A.L., K.A. Forney, J. E.M. Oleson, J. Barlow. 2017. Abundance estimates of cetaceans from a line-transect survey within the U.S Hawaiian Islands Exclusive Economic Zone. Fishery Bulletin 115: 129-142.
Cetacean - dolphin	Lagenorhynchus acutus	Atlantic white-sided dolphin	Western North Atlantic	Ship or boat line-transect survey	Aerial line-transect survey		Palka 2020, Lawson and Gosselin 2018	Palka, D. 2020. Cetacean abundance estimates in US northwestern Atlantic Ocean waters from summer 2016 line transect surveys conducted by the Northeast Fisheries Science Center. Northeast Fish. Sci. Cent. Ref. Doc. 20-05; Lawson J, and J-F. Gosselin 2018 Estimates of cetacean abundance from the 2016 NAISS aerial surveys of eastern Canadian waters, with a comparison to estimates from the 2007 TNAS…
Cetacean - dolphin	Lagenorhynchus albirostris	Whitebeaked dolphin	Western North Atlantic	Aerial line-transect survey			Lawson and Gosselin 2018	Lawson J, and J-F. Gosselin 2018 Estimates of cetacean abundance from the 2016 NAISS aerial surveys of eastern Canadian waters, with a comparison to estimates from the 2007 TNASS NAAMCO SC/25/AE/09 40 pp.
Cetacean - dolphin	Lagenorhynchus obliquidens	Pacific White-Sided Dolphin	California/Oregon/Washington, Northern And Southern Stocks	Ship or boat line-transect survey			Barlow 2016	Barlow, J. 2016. Cetacean abundance in the California current estimated from ship-based line-transect surveys in 1991-2014. Southwest Fisheries Science Center, Administrative Report, LJ-2016-01. 63 p.Becker, E.A., K.A. Forney, M.C. Ferguson, J. Barlow, J.V. Redfern. 2012. Predictive Modeling of Cetacean Densities in the California Current Ecosystem based on Summer/Fall Ship Surveys in 1991- 2008.…
Cetacean - dolphin	Lagenorhynchus obliquidens	Pacific White-Sided Dolphin	North Pacific	Ship or boat line-transect survey			Buckland et al. 1993	Buckland, S. T., K. L. Cattanach, and R. C. Hobbs. 1993. Abundance estimates of Pacific white-sided dolphin, northern right whale dolphin, Dall’s porpoise and northern fur seal in the North Pacific, 1987/90, p. 387- 407. In W. Shaw, R. L. Burgner, and J. Ito (eds.), Biology, distribution and stock assessment of species caught in the high seas driftnet fisheries in the North Pacific Ocean. Interna…
Cetacean - dolphin	Lissodelphis borealis	Northern Right-Whale Dolphin	California/Oregon/Washington	Ship or boat line-transect survey			Barlow 2016	Barlow, J. 2016. Cetacean abundance in the California current estimated from ship-based line-transect surveys in 1991-2014. Southwest Fisheries Science Center, Administrative Report, LJ-2016-01. 63 p.Becker, E.A., K.A. Forney, M.C. Ferguson, J. Barlow, J.V. Redfern. 2012. Predictive Modeling of Cetacean Densities in the California Current Ecosystem based on Summer/Fall Ship Surveys in 1991- 2008.…
Cetacean - dolphin	Stenella attenuata	Pantropical Spotted Dolphin	Northern Gulf of Mexico Stock	Ship or boat line-transect survey			Not listed in SAR	Not listed in SAR
Cetacean - dolphin	Stenella attenuata	Pantropical Spotted Dolphin	4 Islands Stocks	Ship or boat line-transect survey			Bradford et al. 2017	Bradford, A.L., K.A. Forney, J. E.M. Oleson, J. Barlow. 2017. Abundance estimates of cetaceans from a line-transect survey within the U.S Hawaiian Islands Exclusive Economic Zone. Fishery Bulletin 115: 129-142.
Cetacean - dolphin	Stenella attenuata	Pantropical Spotted Dolphin	Hawaii Island	Ship or boat line-transect survey			Bradford et al. 2017	Bradford, A.L., K.A. Forney, J. E.M. Oleson, J. Barlow. 2017. Abundance estimates of cetaceans from a line-transect survey within the U.S Hawaiian Islands Exclusive Economic Zone. Fishery Bulletin 115: 129-142.
Cetacean - dolphin	Stenella attenuata	Pantropical Spotted Dolphin	Hawaiian Pelagic	Ship or boat line-transect survey			Bradford et al. 2017	Bradford, A.L., K.A. Forney, J. E.M. Oleson, J. Barlow. 2017. Abundance estimates of cetaceans from a line-transect survey within the U.S Hawaiian Islands Exclusive Economic Zone. Fishery Bulletin 115: 129-142.
Cetacean - dolphin	Stenella attenuata	Pantropical Spotted Dolphin	Oahu	Ship or boat line-transect survey			Bradford et al. 2017	Bradford, A.L., K.A. Forney, J. E.M. Oleson, J. Barlow. 2017. Abundance estimates of cetaceans from a line-transect survey within the U.S Hawaiian Islands Exclusive Economic Zone. Fishery Bulletin 115: 129-142.
Cetacean - dolphin	Stenella attenuata	Pantropical Spotted Dolphin	Western North Atlantic	Ship or boat line-transect survey			Garrison 2020, Palka 2020	Garrison, L.P. 2020. Abundance of cetaceans along the southeast U.S. east coast from a summer 2016 vessel survey. Southeast Fisheries Science Center, Protected Resources and Biodiversity Division, 75 Virginia Beach Dr., Miami, FL 33140. PRD Contribution # PRD-2020-04, 17 pp. Palka, D. 2020. Cetacean abundance estimates in US northwestern Atlantic Ocean waters from summer 2016 line transect survey…
Cetacean - dolphin	Stenella clymene	Clymene dolphin	Gulf of Mexico Stock	Ship or boat line-transect survey			Not listed in SAR	Not listed in SAR
Cetacean - dolphin	Stenella clymene	Clymene dolphin	Western North Atlantic	Ship or boat line-transect survey			Garrison 2020, Palka 2022	Garrison, L.P. 2020. Abundance of cetaceans along the southeast U.S. east coast from a summer 2016 vessel survey. Southeast Fisheries Science Center, Protected Resources and Biodiversity Division, 75 Virginia Beach Dr., Miami, FL 33140. PRD Contribution # PRD-2020-04, 17 pp. Palka, D. 2020. Cetacean abundance estimates in US northwestern Atlantic Ocean waters from summer 2016 line transect survey…
Cetacean - dolphin	Stenella coeruleoalba	Striped Dolphin	California/Oregon/Washington Stock	Ship or boat line-transect survey			Barlow 2016	Barlow, J. 2016. Cetacean abundance in the California current estimated from ship-based line-transect surveys in 1991-2014. Southwest Fisheries Science Center, Administrative Report, LJ-2016-01. 63 p.
Cetacean - dolphin	Stenella coeruleoalba	Striped Dolphin	Gulf of Mexico Stock	Ship or boat line-transect survey			Not listed in SAR
Cetacean - dolphin	Stenella coeruleoalba	Striped Dolphin	Hawaii Stock	Ship or boat line-transect survey			Bradford et al. 2017	Bradford, A.L., K.A. Forney, J. E.M. Oleson, J. Barlow. 2017. Abundance estimates of cetaceans from a line-transect survey within the U.S Hawaiian Islands Exclusive Economic Zone. Fishery Bulletin 115: 129-142.
Cetacean - dolphin	Stenella coeruleoalba	Striped Dolphin	Western North Atlantic	Ship or boat line-transect survey			Garrison 2020, Palka 2024	Garrison, L.P. 2020. Abundance of cetaceans along the southeast U.S. east coast from a summer 2016 vessel survey. Southeast Fisheries Science Center, Protected Resources and Biodiversity Division, 75 Virginia Beach Dr., Miami, FL 33140. PRD Contribution # PRD-2020-04, 17 pp. Palka, D. 2020. Cetacean abundance estimates in US northwestern Atlantic Ocean waters from summer 2016 line transect survey…
Cetacean - dolphin	Stenella frontalis	Atlantic spotted dolphin	Puerto Rico and U.S. Virgin Islands Stock	NA			Garrison 2020, Palka 2022	Garrison, L.P. 2020. Abundance of cetaceans along the southeast U.S. east coast from a summer 2016 vessel survey. Southeast Fisheries Science Center, Protected Resources and Biodiversity Division, 75 Virginia Beach Dr., Miami, FL 33140. PRD Contribution # PRD-2020-04, 17 pp. Palka, D. 2020. Cetacean abundance estimates in US northwestern Atlantic Ocean waters from summer 2016 line transect survey…
Cetacean - dolphin	Stenella frontalis	Atlantic spotted dolphin	Gulf of Mexico Stock	Ship or boat line-transect survey			Hansen et al. 1995
Cetacean - dolphin	Stenella frontalis	Atlantic spotted dolphin	Western North Atlantic	Ship or boat line-transect survey			Garrison 2020, Palka 2022	Garrison, L.P. 2020. Abundance of cetaceans along the southeast U.S. east coast from a summer 2016 vessel survey. Southeast Fisheries Science Center, Protected Resources and Biodiversity Division, 75 Virginia Beach Dr., Miami, FL 33140. PRD Contribution # PRD-2020-04, 17 pp. Palka, D. 2020. Cetacean abundance estimates in US northwestern Atlantic Ocean waters from summer 2016 line transect survey…
Cetacean - dolphin	Stenella longirostris	Spinner Dolphin	Hawaii Island	Indiv ID			Tyne et al. 2013	Tyne, J., K. Pollock, D. Johnston, and L. Bejder. 2013. Abundance and survival rates of the Hawaii Island associated spinner dolphin (Stenella longirostris) stock. PLoS ONE 9(1): e86132. doi: 10.1371/journal.pone.0086132.
Cetacean - dolphin	Stenella longirostris	Spinner Dolphin	Hawaii Pelagic	Indiv ID			Tyne et al. 2013	Tyne, J., K. Pollock, D. Johnston, and L. Bejder. 2013. Abundance and survival rates of the Hawaii Island associated spinner dolphin (Stenella longirostris) stock. PLoS ONE 9(1): e86132. doi: 10.1371/journal.pone.0086132.
Cetacean - dolphin	Stenella longirostris	Spinner Dolphin	Kauai / Niihau	Indiv ID			Tyne et al. 2013	Tyne, J., K. Pollock, D. Johnston, and L. Bejder. 2013. Abundance and survival rates of the Hawaii Island associated spinner dolphin (Stenella longirostris) stock. PLoS ONE 9(1): e86132. doi: 10.1371/journal.pone.0086132.
Cetacean - dolphin	Stenella longirostris	Spinner Dolphin	Kure / Midway	Indiv ID			Tyne et al. 2013	Tyne, J., K. Pollock, D. Johnston, and L. Bejder. 2013. Abundance and survival rates of the Hawaii Island associated spinner dolphin (Stenella longirostris) stock. PLoS ONE 9(1): e86132. doi: 10.1371/journal.pone.0086132.
Cetacean - dolphin	Stenella longirostris	Spinner Dolphin	Oahu / 4 Islands	Indiv ID			Tyne et al. 2013	Tyne, J., K. Pollock, D. Johnston, and L. Bejder. 2013. Abundance and survival rates of the Hawaii Island associated spinner dolphin (Stenella longirostris) stock. PLoS ONE 9(1): e86132. doi: 10.1371/journal.pone.0086132.
Cetacean - dolphin	Stenella longirostris	Spinner Dolphin	Pearl And Hermes Reef Stocks	Indiv ID			Tyne et al. 2013	Tyne, J., K. Pollock, D. Johnston, and L. Bejder. 2013. Abundance and survival rates of the Hawaii Island associated spinner dolphin (Stenella longirostris) stock. PLoS ONE 9(1): e86132. doi: 10.1371/journal.pone.0086132.
Cetacean - dolphin	Stenella longirostris	Spinner Dolphin	American Samoa Stock	NA
Cetacean - dolphin	Stenella longirostris	Spinner Dolphin	Western North Atlantic	Ship or boat line-transect survey			Garrison 2020, Palka 2023	Garrison, L.P. 2020. Abundance of cetaceans along the southeast U.S. east coast from a summer 2016 vessel survey. Southeast Fisheries Science Center, Protected Resources and Biodiversity Division, 75 Virginia Beach Dr., Miami, FL 33140. PRD Contribution # PRD-2020-04, 17 pp. Palka, D. 2020. Cetacean abundance estimates in US northwestern Atlantic Ocean waters from summer 2016 line transect survey…
Cetacean - dolphin	Steno bredanensis	Rough-Toothed Dolphin	Gulf of Mexico Stock	Ship or boat line-transect survey			Garrison 2016	Garrison, L.P.2016. Abundance of marine mammals in waters of the U.S. Gulf of Mexico during summer 2009. Southeast Fisheries Science Center, Protected Resources and Biodiversity Division, 75 Virginia Beach Dr., Miami, FL 33140. PRBD Contribution # PRBD-2016-09, 18 pp
Cetacean - dolphin	Steno bredanensis	Rough-Toothed Dolphin	Hawaii Stock	Ship or boat line-transect survey			Bradford et al. 2017	Bradford, A.L., K.A. Forney, J. E.M. Oleson, J. Barlow. 2017. Abundance estimates of cetaceans from a line-transect survey within the U.S Hawaiian Islands Exclusive Economic Zone. Fishery Bulletin 115: 129-142.
Cetacean - dolphin	Steno bredanensis	Rough-Toothed Dolphin	Western North Atlantic	Ship or boat line-transect survey	Aerial line-transect survey		Palka 2012; Garrison 2016	Palka, D. 2012. Cetacean abundance estimates in US northwestern Atlantic Ocean waters from summer 2011 line transect survey. U.S. Dept. Commer., Northeast Fish. Sci. Cent. Ref. Doc. 12-29, 37 pp.; Garrison, L.P. 2016. Abundance of marine mammals in waters of the U.S. East Coast during summer 2011. NOAA Southeast Fisheries Science Center, Protected Resources and Biodiversity Division, 75 Virginia …
Cetacean - dolphin	Tursiops truncatus	Common Bottlenose Dolphin	Gulf of Mexico, Continental Shelf Stock	Aerial line-transect survey			Not listed in SAR
Cetacean - dolphin	Tursiops truncatus	Common Bottlenose Dolphin	Gulf of Mexico, Eastern Coastal Stock	Aerial line-transect survey			Not listed in SAR	Not listed in SAR
Cetacean - dolphin	Tursiops truncatus	Common Bottlenose Dolphin	Gulf of Mexico, Northern Coastal Stock	Aerial line-transect survey			Not listed in SAR	Not listed in SAR
Cetacean - dolphin	Tursiops truncatus	Common Bottlenose Dolphin	Gulf of Mexico, Western Coastal Stock	Aerial line-transect survey			Not listed in SAR	Not listed in SAR
Cetacean - dolphin	Tursiops truncatus	Common Bottlenose Dolphin	Indian River Lagoon Estuarine System Stock	Aerial line-transect survey			Durden et al. 2011
Cetacean - dolphin	Tursiops truncatus	Common Bottlenose Dolphin	Northern Gulf of Mexico Bay, Sound, and Estuarine Stocks (Mississippi River Delta)	Aerial line-transect survey			Garrison 2017	Garrison, L.P. 2017. Abundance of coastal and continental shelf stocks of bottlenose dolphins in the northern Gulf of Mexico: 2011-2012. Southeast Fisheries Science Center, Protected Resources and Biodiversity Division, 75 Virginia Beach Dr., Miami, FL 33140. PRBD Contribution # PRBD-2017-04, 34 pp.
Cetacean - dolphin	Tursiops truncatus	Common Bottlenose Dolphin	Western North Atlantic, Central Florida Coastal Stock	Aerial line-transect survey			Garrison et al. 2017a	Garrison, L.P., K. Barry, and W. Hoggard. 2017a. The abundance of coastal morphotype bottlenose dolphins on the U.S. east coast: 2002-2016. Southeast Fisheries Science Center, Protected Resources and Biodiversity Division, 75 Virginia Beach Dr., Miami, FL 33140. PRBD Contribution # PRBD-2017-01, XX pp.
Cetacean - dolphin	Tursiops truncatus	Common Bottlenose Dolphin	Western North Atlantic, Northern Florida Coastal Stock	Aerial line-transect survey			Garrison et al. 2017a	Garrison, L.P., K. Barry, and W. Hoggard. 2017a. The abundance of coastal morphotype bottlenose dolphins on the U.S. east coast: 2002-2016. Southeast Fisheries Science Center, Protected Resources and Biodiversity Division, 75 Virginia Beach Dr., Miami, FL 33140. PRBD Contribution # PRBD-2017-01, XX pp.
Cetacean - dolphin	Tursiops truncatus	Common Bottlenose Dolphin	Western North Atlantic, Northern Migratory Coastal Stock	Aerial line-transect survey			Garrison et al. 2017a	Garrison, L.P., K. Barry, and W. Hoggard. 2017a. The abundance of coastal morphotype bottlenose dolphins on the U.S. east coast: 2002-2016. Southeast Fisheries Science Center, Protected Resources and Biodiversity Division, 75 Virginia Beach Dr., Miami, FL 33140. PRBD Contribution # PRBD-2017-01, XX pp.
Cetacean - dolphin	Tursiops truncatus	Common Bottlenose Dolphin	Western North Atlantic, South Carolina/Georgia Coastal Stock	Aerial line-transect survey			Garrison et al. 2017a	Garrison, L.P., K. Barry, and W. Hoggard. 2017a. The abundance of coastal morphotype bottlenose dolphins on the U.S. east coast: 2002-2016. Southeast Fisheries Science Center, Protected Resources and Biodiversity Division, 75 Virginia Beach Dr., Miami, FL 33140. PRBD Contribution # PRBD-2017-01, XX pp.
Cetacean - dolphin	Tursiops truncatus	Common Bottlenose Dolphin	Western North Atlantic, Southern Migratory Coastal Stock	Aerial line-transect survey			Garrison et al. 2017a	Garrison, L.P., K. Barry, and W. Hoggard. 2017a. The abundance of coastal morphotype bottlenose dolphins on the U.S. east coast: 2002-2016. Southeast Fisheries Science Center, Protected Resources and Biodiversity Division, 75 Virginia Beach Dr., Miami, FL 33140. PRBD Contribution # PRBD-2017-01, XX pp.
Cetacean - dolphin	Tursiops truncatus	Common Bottlenose Dolphin	Barataria Bay Estuarine System Stock	Indiv ID			McDonald et al. 2017	McDonald, T.L., F.E. Hornsby, T.R. Speakman, E.S. Zolman, K.D. Mullin, C. Sinclair, P.E. Rosel, L. Thomas and L.H. Schwacke. 2017. Survival, density, and abundance of common bottlenose dolphins in Barataria Bay following the Deepwater Horizon oil spill. Endanger. Spec. Res. 33:193–209.
Cetacean - dolphin	Tursiops truncatus	Common Bottlenose Dolphin	California Coastal Stock	Indiv ID			Weller et al. 2016	Weller, D.W., G.S. Campbell, A. Debich, A.G. Kesaris, and R.H. Defran. 2016. Mark-recapture abundance estimate of California coastal stock bottlenose dolphins: November 2009 to April 2011. NOAA Technical Memorandum. NOAA-TM-NMFS SWFSC-563. 18 p.
Cetacean - dolphin	Tursiops truncatus	Common Bottlenose Dolphin	Central Georgia Estuarine System Stock	Indiv ID			Balmer et al. 2013	Balmer, B.C., L.H. Schwacke, R.S. Wells, J.D. Adams, R.C. George, S.M. Lane, W.A. McLellan, P.E. Rosel, K. Sparks, T. Speakman, E.S. Zolman and D.A. Pabst. 2013. Comparison of abundance and habitat usage for common bottlenose dolphins between sites exposed to differential anthropogenic stressors within the estuaries of southern Georgia, U.S.A. Mar. Mamm. Sci. 29:E114-135.
Cetacean - dolphin	Tursiops truncatus	Common Bottlenose Dolphin	Charleston Estuarine System Stock	Indiv ID			Speakman et al. 2010
Cetacean - dolphin	Tursiops truncatus	Common Bottlenose Dolphin	Choctawhatchee Bay Stock	Indiv ID			Conn et al. 2011	Conn, P.B., A.M. Gorgone, A.R. Jugovich, B.L. Byrd and L.J. Hansen. 2011. Accounting for transients when estimating abundance: A case study of bottlenose dolphins in Choctawhatchee Bay, Florida. J. Wildl. Manage. 75(3): 569-579.
Cetacean - dolphin	Tursiops truncatus	Common Bottlenose Dolphin	Florida Bay Stock	Indiv ID			Read et al. in review
Cetacean - dolphin	Tursiops truncatus	Common Bottlenose Dolphin	Hawaii 4 Islands Region Stock	Indiv ID			Baird et al. 2009	Baird, R.W., A.M. Gorgone, D.J. McSweeney, A.D. Ligon, M.H. Deakos, D.L. Webster, G.S. Schorr, K.K. Martien, D.R. Salden, and S.D. Mahaffy. 2009. Population structure of island-associated dolphins: Evidence from photo-identification of common bottlenose d
Cetacean - dolphin	Tursiops truncatus	Common Bottlenose Dolphin	Hawaii Pelagic Stock	Indiv ID			Baird et al. 2017	Full citation not listed in SAR
Cetacean - dolphin	Tursiops truncatus	Common Bottlenose Dolphin	Jacksonville Estuarine System Stock	Indiv ID			Gubbens et al. 2003
Cetacean - dolphin	Tursiops truncatus	Common Bottlenose Dolphin	Kaua'i and Ni'ihau Stock	Indiv ID			Baird et al. 2017	Full citation not listed in SAR
Cetacean - dolphin	Tursiops truncatus	Common Bottlenose Dolphin	Northern Georgia/Southern South Carolina Estuarine System Stock	Indiv ID			Gubbens et al. 2003
Cetacean - dolphin	Tursiops truncatus	Common Bottlenose Dolphin	Northern Gulf of Mexico Bay, Sound, and Estuarine Stocks (Mississippi Sound, Lake Borgne, Bay Boudreau)	Indiv ID			Mullin et al. 2017
Cetacean - dolphin	Tursiops truncatus	Common Bottlenose Dolphin	Northern Gulf of Mexico Bay, Sound, and Estuarine Stocks (Sarasota Bay, Little Sarasota Bay)	Indiv ID			Tyson and Wells 2016	Tyson, R.B. and R.S. Wells. 2016. Sarasota Bay/Little Sarasota Bay bottlenose dolphin abundance estimates: 2015. Prepared for National Marine Fisheries Service, northern Gulf of Mexico bay, sound, and estuary bottlenose dolphin stock blocks B20 and B35, combined. Southeast Fisheries Science Center, Protected Resources and Biodiversity Division, 75 Virginia Beach Dr., Miami, FL 33140. PRBD Contrib…
Cetacean - dolphin	Tursiops truncatus	Common Bottlenose Dolphin	Northern Gulf of Mexico Bay, Sound, and Estuarine Stocks (St. Andrew Bay)	Indiv ID			Balmer et al. 2019
Cetacean - dolphin	Tursiops truncatus	Common Bottlenose Dolphin	Northern Gulf of Mexico Bay, Sound, and Estuarine Stocks (St. Joseph Bay)	Indiv ID			Balmer et al. 2018
Cetacean - dolphin	Tursiops truncatus	Common Bottlenose Dolphin	Northern North Carolina Estuarine System Stock	Indiv ID			Urian et al. 2013	Urian, K.W., D.M. Waples, R.B. Tyson, L.E. Willams Hodge and A.J. Read. 2013. Abundance of bottlenose dolphins (Tursiops truncatus) in estuarine and near-shore waters of North Carolina, USA. J. N. C. Acad. Sci. 129:165–171.
Cetacean - dolphin	Tursiops truncatus	Common Bottlenose Dolphin	O'ahu Stock	Indiv ID			Baird et al. 2009	Baird, R.W., A.M. Gorgone, D.J. McSweeney, A.D. Ligon, M.H. Deakos, D.L. Webster, G.S. Schorr, K.K. Martien, D.R. Salden, and S.D. Mahaffy. 2009. Population structure of island-associated dolphins: Evidence from photo-identification of common bottlenose dolphins (Tursiops truncatus) in the main Hawaiian Islands. Mar. Mam. Sci. 25:251-274.
Cetacean - dolphin	Tursiops truncatus	Common Bottlenose Dolphin	Southern Georgia Estuarine System Stock	Indiv ID			Balmer et al. 2013	Balmer, B.C., L.H. Schwacke, R.S. Wells, J.D. Adams, R.C. George, S.M. Lane, W.A. McLellan, P.E. Rosel, K. Sparks, T. Speakman, E.S. Zolman and D.A. Pabst. 2013. Comparison of abundance and habitat usage for common bottlenose dolphins between sites exposed to differential anthropogenic stressors within the estuaries of southern Georgia, U.S.A. Mar. Mamm. Sci. 29(2): E114-E135.
Cetacean - dolphin	Tursiops truncatus	Common Bottlenose Dolphin	St. Andrew Bay	Indiv ID			Balmer et al. 2019	Balmer, B., S. Watwood, B. Quigley, T. Speakman, K. Barry, K. Mullin, P. Rosel, C. Sinclair, E. Zolman and L. Schwacke. 2019. Common bottlenose dolphin (Tursiops truncatus) abundance and distribution patterns in St. Andrew Bay, Florida, USA. Aquat. Conserv.: Mar. Freshw. Ecosyst. 2019:1–13
Cetacean - dolphin	Tursiops truncatus	Common Bottlenose Dolphin	St. Joseph Bay	Indiv ID			Balmer et al. 2018	Balmer, B.C., T. McDonald, F. Hornsby, J. Adams, J. Allen, A. Barleycorn, P. Clarke, C. Cush, A. Honaker, K. McHugh, T. Speakman, R. Wells and L. Schwacke. 2018. Long-term trends in a northern Gulf of Mexico common bottlenose dolphin (Tursiops truncatus) population in the wake of the Deepwater Horizon oil spill. J. Cetacean Res. Manage. 18:1–9.
Cetacean - dolphin	Tursiops truncatus	Common Bottlenose Dolphin	West Bay Stock	Indiv ID			Litz et al. 2019	Litz, J.A., E.L. Ronje, H.R. Whitehead and L.P. Garrison. 2019. Updated abundance estimate for common bottlense dolphins (Tursiops truncatus) inhabiting West Bay, Texas. Aquatic Conserv.: Mar. Freshw. Ecosyst. 2019:1–12
Cetacean - dolphin	Tursiops truncatus	Common Bottlenose Dolphin	Biscayne Bay Stock	NA
Cetacean - dolphin	Tursiops truncatus	Common Bottlenose Dolphin	Jarvis Island Stock	NA
Cetacean - dolphin	Tursiops truncatus	Common Bottlenose Dolphin	Northern Gulf of Mexico Bay, Sound, and Estuarine Stocks (Atchafalaya Bay, Vermilion Bay, West Cote Blanche Bay	NA
Cetacean - dolphin	Tursiops truncatus	Common Bottlenose Dolphin	Northern Gulf of Mexico Bay, Sound, and Estuarine Stocks (Calcasieu Lake)	NA
Cetacean - dolphin	Tursiops truncatus	Common Bottlenose Dolphin	Northern Gulf of Mexico Bay, Sound, and Estuarine Stocks (Caloosahatchee River)	NA
Cetacean - dolphin	Tursiops truncatus	Common Bottlenose Dolphin	Northern Gulf of Mexico Bay, Sound, and Estuarine Stocks (Chokoloskee Bay, Ten Thousand Islands, Gullivan Bay)	NA
Cetacean - dolphin	Tursiops truncatus	Common Bottlenose Dolphin	Northern Gulf of Mexico Bay, Sound, and Estuarine Stocks (Copano Bay, Aransas Bay, San Antonio Bay, Redfish Bay, Espirtu Santo Bay)	NA
Cetacean - dolphin	Tursiops truncatus	Common Bottlenose Dolphin	Northern Gulf of Mexico Bay, Sound, and Estuarine Stocks (Estero Bay)	NA
Cetacean - dolphin	Tursiops truncatus	Common Bottlenose Dolphin	Northern Gulf of Mexico Bay, Sound, and Estuarine Stocks (Florida Keys Bahia Honda to Key West)	NA
Cetacean - dolphin	Tursiops truncatus	Common Bottlenose Dolphin	Northern Gulf of Mexico Bay, Sound, and Estuarine Stocks (Galveston Bay, East Bay, Trinity Bay)	NA
Cetacean - dolphin	Tursiops truncatus	Common Bottlenose Dolphin	Northern Gulf of Mexico Bay, Sound, and Estuarine Stocks (Laguna Madre)	NA
Cetacean - dolphin	Tursiops truncatus	Common Bottlenose Dolphin	Northern Gulf of Mexico Bay, Sound, and Estuarine Stocks (Matagorda Bay, Tres Palacios Bay, Lavaca Bay)	NA
Cetacean - dolphin	Tursiops truncatus	Common Bottlenose Dolphin	Northern Gulf of Mexico Bay, Sound, and Estuarine Stocks (Mobile Bay, Bonsecour Bay)	NA
Cetacean - dolphin	Tursiops truncatus	Common Bottlenose Dolphin	Northern Gulf of Mexico Bay, Sound, and Estuarine Stocks (Northern Gulf of Mexico Bay, Sound, and Estuarine Stocks (Atchafalaya Bay, Vermilion Bay, West Cote Blanche Bay)	NA
Cetacean - dolphin	Tursiops truncatus	Common Bottlenose Dolphin	Northern Gulf of Mexico Bay, Sound, and Estuarine Stocks (Nueces Bay, Corpus Christi Bay)	NA
Cetacean - dolphin	Tursiops truncatus	Common Bottlenose Dolphin	Northern Gulf of Mexico Bay, Sound, and Estuarine Stocks (Pensacola Bay, East Bay)	NA
Cetacean - dolphin	Tursiops truncatus	Common Bottlenose Dolphin	Northern Gulf of Mexico Bay, Sound, and Estuarine Stocks (Perdido Bay)	NA
Cetacean - dolphin	Tursiops truncatus	Common Bottlenose Dolphin	Northern Gulf of Mexico Bay, Sound, and Estuarine Stocks (Pine Island Sound, Charlotte Harbor, Lemon Bay, Gasparilla Sound)	NA
Cetacean - dolphin	Tursiops truncatus	Common Bottlenose Dolphin	Northern Gulf of Mexico Bay, Sound, and Estuarine Stocks (Sabine Lake)	NA
Cetacean - dolphin	Tursiops truncatus	Common Bottlenose Dolphin	Northern Gulf of Mexico Bay, Sound, and Estuarine Stocks (St. Joseph Sound, Clearwater Harbor)	NA
Cetacean - dolphin	Tursiops truncatus	Common Bottlenose Dolphin	Northern Gulf of Mexico Bay, Sound, and Estuarine Stocks (St. Vincent Sound, Apalachicola Bay, St. George Sound)	NA
Cetacean - dolphin	Tursiops truncatus	Common Bottlenose Dolphin	Northern Gulf of Mexico Bay, Sound, and Estuarine Stocks (Tampa Bay)	NA
Cetacean - dolphin	Tursiops truncatus	Common Bottlenose Dolphin	Northern Gulf of Mexico Bay, Sound, and Estuarine Stocks (Waccasassa Bay, Withlacoochee Bay, Crystal Bay)	NA
Cetacean - dolphin	Tursiops truncatus	Common Bottlenose Dolphin	Northern Gulf of Mexico Bay, Sound, and Estuarine Stocks (West Bay)	NA
Cetacean - dolphin	Tursiops truncatus	Common Bottlenose Dolphin	Northern Gulf of Mexico Bay, Sound, and Estuarine Stocks (Whitewater Bay Stock)	NA
Cetacean - dolphin	Tursiops truncatus	Common Bottlenose Dolphin	Northern South Carolina Estuarine System Stock	NA
Cetacean - dolphin	Tursiops truncatus	Common Bottlenose Dolphin	Puerto Rico and U.S. Virgin Islands Stock	NA
Cetacean - dolphin	Tursiops truncatus	Common Bottlenose Dolphin	Southern North Carolina Estuarine System Stock	NA
Cetacean - dolphin	Tursiops truncatus	Common Bottlenose Dolphin	California/Oregon/Washington Offshore Stock	Ship or boat line-transect survey			Barlow 2016	Barlow, J. 2016. Cetacean abundance in the California current estimated from ship-based line-transect surveys in 1991-2014. Southwest Fisheries Science Center, Administrative Report, LJ-2016-01. 63 p.Becker, E.A., K.A. Forney, M.C. Ferguson, J. Barlow, J.V. Redfern. 2012. Predictive Modeling of Cetacean Densities in the California Current Ecosystem based on Summer/Fall Ship Surveys in 1991- 2008.…
Cetacean - dolphin	Tursiops truncatus	Common Bottlenose Dolphin	Gulf of Maine/Bay of Fundy	Ship or boat line-transect survey	Aerial line-transect survey		Palka 2020	Palka, D. 2020. Cetacean abundance estimates in US northwestern Atlantic Ocean waters from summer 2016 line transect surveys conducted by the Northeast Fisheries Science Center. Northeast Fish. Sci. Cent. Ref. Doc. 20-05
Cetacean - dolphin	Tursiops truncatus	Common Bottlenose Dolphin	Gulf of Mexico, Oceanic Stock	Ship or boat line-transect survey			Not listed in SAR	Not listed in SAR
Cetacean - dolphin	Tursiops truncatus	Common Bottlenose Dolphin	Hawaii Stock	Ship or boat line-transect survey			Bradford et al. 2017	Bradford, A.L., K.A. Forney, J. E.M. Oleson, J. Barlow. 2017. Abundance estimates of cetaceans from a line-transect survey within the U.S Hawaiian Islands Exclusive Economic Zone. Fishery Bulletin 115: 129-142.
Cetacean - dolphin	Tursiops truncatus	Common Bottlenose Dolphin	Northern Gulf of Mexico Bay, Sound, and Estuarine Stocks (Terrebonne Bay, Timbalier Bay)	Ship or boat line-transect survey			Litz et al. 2018
Cetacean - dolphin	Tursiops truncatus	Common Bottlenose Dolphin	Western North Atlantic, offshore	Ship or boat line-transect survey	Aerial line-transect survey		Garrison 2020, Palka 2024	Garrison, L.P. 2020. Abundance of cetaceans along the southeast U.S. east coast from a summer 2016 vessel survey. Southeast Fisheries Science Center, Protected Resources and Biodiversity Division, 75 Virginia Beach Dr., Miami, FL 33140. PRD Contribution # PRD-2020-04, 17 pp. Palka, D. 2020. Cetacean abundance estimates in US northwestern Atlantic Ocean waters from summer 2016 line transect survey…
Cetacean - large whale	Balaena mysticetus	Bowhead Whale	Western Arctic	Indiv ID			Givens et al. 2018	Givens, G. H., J. A. Mocklin, L. Vate Brattström, B. J. Tudor, W. R. Koski, J. E. Zeh, R. Suydam, and J. C. George. 2018. Adult survival rate and 2011 abundance of Bering-Chukchi-Beaufort Seas bowhead whales from photo-identification data over three decades. Unpubl. doc. submitted to Int. Whal. Comm. Scientific Committee (SC/67b/AWMP/01 Rev1). 24 p.
Cetacean - large whale	Balaenoptera acutorostrata	Minke Whale	Alaska Stock	NA
Cetacean - large whale	Balaenoptera acutorostrata	Minke Whale	Hawaii Stock	NA
Cetacean - large whale	Balaenoptera acutorostrata	Minke Whale	California/Oregon/Washington	Ship or boat line-transect survey	Aerial line-transect survey		Barlow 2016	Barlow, J. 2016. Cetacean abundance in the California current estimated from ship-based line-transect surveys in 1991-2014. Southwest Fisheries Science Center, Administrative Report, LJ-2016-01. 63 p.
Cetacean - large whale	Balaenoptera acutorostrata	Minke Whale	Canadian east coast	Ship or boat line-transect survey	Aerial line-transect survey		Palka 2020	Palka, D. 2020. Cetacean abundance estimates in US northwestern Atlantic Ocean waters from summer 2016 line transect surveys conducted by the Northeast Fisheries Science Center. Northeast Fish. Sci. Cent. Ref. Doc. 20-05
Cetacean - large whale	Balaenoptera borealis	Sei Whale	Western North Atlantic Stock	NA
Cetacean - large whale	Balaenoptera borealis	Sei Whale	Eastern North Pacific Stock	Ship or boat line-transect survey			Barlow 2016	Barlow, J. 2016. Cetacean abundance in the California current estimated from ship-based line-transect surveys in 1991-2014. Southwest Fisheries Science Center, Administrative Report, LJ-2016-01. 63 p.Becker, E.A., K.A. Forney, M.C. Ferguson, J. Barlow, J.V. Redfern. 2012. Predictive Modeling of Cetacean Densities in the California Current Ecosystem based on Summer/Fall Ship Surveys in 1991- 2008.…
Cetacean - large whale	Balaenoptera borealis	Sei Whale	Hawaii Stock	Ship or boat line-transect survey			Bradford et al. 2017	Bradford, A.L., K.A. Forney, J. E.M. Oleson, J. Barlow. 2017. Abundance estimates of cetaceans from a line-transect survey within the U.S Hawaiian Islands Exclusive Economic Zone. Fishery Bulletin 115: 129-142.
Cetacean - large whale	Balaenoptera borealis	Sei Whale	Nova Scotia	Ship or boat line-transect survey	Aerial line-transect survey		Palka et al. 2017	Palka, D.L., S. Chavez-Rosales, E. Josephson, D. Cholewiak, H.L. Haas, L. Garrison, M. Jones, D. Sigourney, G. Waring, M. Jech, E. Broughton, M. Soldevilla, G. Davis, A. DeAngelis, C.R. Sasso, M.V.Winton, R.J. Smolowitz, G. Fay, E. LaBrecque, J.B. Leiness, Dettloff, M. Warden, K. Murray, and C. Orphanides. 2017. Atlantic Marine Assessment Program for Protected Species: 2010–2014. OCS Study BOEM 2…
Cetacean - large whale	Balaenoptera edeni	Bryde’s Whale	Eastern Tropical Pacific	Ship or boat line-transect survey			Wade and Gerrodette 1993	Wade, P. R. and T. Gerrodette. 1993. Estimates of cetacean abundance and distribution in the eastern tropical Pacific. Rept. Int. Whal. Commn. 43:477-493
Cetacean - large whale	Balaenoptera edeni	Bryde’s Whale	Northern Gulf of Mexico Stock	Ship or boat line-transect survey			Garrison 2016	Garrison, L.P. 2016. Abundance of marine mammals in waters of the U.S. Gulf of Mexico during summer 2009. NOAA Southeast Fisheries Science Center, Protected Resources and Biodiversity Division, 75 Virginia Beach Drive, Miami, FL 33140. PRBD Contribution #PRBD-2016-09, 18 pp.
Cetacean - large whale	Balaenoptera edeni	Bryde's Whale	Hawaii Stock	Ship or boat line-transect survey			Bradford et al. 2017	Bradford, A.L., K.A. Forney, J. E.M. Oleson, J. Barlow. 2017. Abundance estimates of cetaceans from a line-transect survey within the U.S Hawaiian Islands Exclusive Economic Zone. Fishery Bulletin 115: 129-142.
Cetacean - large whale	Balaenoptera musculus	Blue Whale	Western North Atlantic	Indiv ID			Ramp and Sears 2013	Ramp, C., and R. Sears 2013. Distribution, densities, and annual occurrence of individual blue whales (Balaenoptera musculus) in the Gulf of St. Lawrence, Canada from 1980-2008 DFO Can. Sci. Advis. Sec. Res. Doc. 2012/157. vii+37 pp
Cetacean - large whale	Balaenoptera musculus	Blue Whale	Central North Pacific Stock	Ship or boat line-transect survey			Bradford et al. 2017	Bradford, A.L., K.A. Forney, J. E.M. Oleson, J. Barlow. 2017. Abundance estimates of cetaceans from a line-transect survey within the U.S Hawaiian Islands Exclusive Economic Zone. Fishery Bulletin 115: 129-142.
Cetacean - large whale	Balaenoptera musculus	Blue Whale	Eastern North Pacific Stock	Ship or boat line-transect survey			Barlow 2016	Barlow, J. 2016. Cetacean abundance in the California current estimated from ship-based line-transect surveys in 1991-2014. Southwest Fisheries Science Center, Administrative Report, LJ-2016-01. 63 p.Becker, E.A., K.A. Forney, M.C. Ferguson, J. Barlow, J.V. Redfern. 2012. Predictive Modeling of Cetacean Densities in the California Current Ecosystem based on Summer/Fall Ship Surveys in 1991- 2008.…
Cetacean - large whale	Balaenoptera physalus	Fin Whale	Hawaii Stock	Ship or boat line-transect survey			Bradford et al. 2017	Bradford, A.L., K.A. Forney, J. E.M. Oleson, J. Barlow. 2017. Abundance estimates of cetaceans from a line-transect survey within the U.S Hawaiian Islands Exclusive Economic Zone. Fishery Bulletin 115: 129-142.
Cetacean - large whale	Balaenoptera physalus	Fin Whale	Northeast Pacific	Ship or boat line-transect survey			Rone et al. 2017	Rone, B. K., A. N. Zerbini, A. B. Douglas, D. W. Weller, and P. J. Clapham. 2017. Abundance and distribution of cetaceans in the Gulf of Alaska. Mar. Biol. 164:23. DOI: dx.doi.org/10.1007/s00227-016-3052-2 .
Cetacean - large whale	Balaenoptera physalus	Fin Whale	Western North Atlantic	Ship or boat line-transect survey			Garrison 2020, Palka 2020, Lawson and Gosselin 2018	Garrison, L.P. 2020. Abundance of cetaceans along the southeast U.S. east coast from a summer 2016 vessel survey. Southeast Fisheries Science Center, Protected Resources and Biodiversity Division, 75 Virginia Beach Dr., Miami, FL 33140. PRD Contribution # PRD-2020-04, 17 pp., Palka, D. 2020. Cetacean abundance estimates in US northwestern Atlantic Ocean waters from summer 2016 line transect surve…
Cetacean - large whale	Balaenoptera physalus	Fin Whale	California/Oregon/Washington Stock	Ship or boat line-transect survey			Nadeem et al. 2016	Nadeem, K., Moore, J.E., Zhang, Y. and Chipman, H., 2016. Integrating population dynamics models and distance sampling data: a spatial hierarchical state‐space approach. Ecology, 97(7), pp.1735-1745.
Cetacean - large whale	Eschrichtius robustus	Gray Whale	Eastern North Pacific Stock	Other		Land-based counts during migration, with correction factors	Durban et al. 2015	Durban, J., Weller, D., Lang, A. and Perryman, W., 2015. Estimating gray whale abundance from shore-based counts using a multilevel Bayesian model. J. Cetacean Res. Manage. 15: 61-68.
Cetacean - large whale	Eschrichtius robustus	Gray Whale	Western North Pacific Stock	Indiv ID			Cooke 2017	Cooke, J.G., Weller, D.W., Bradford, A.L., Sychenko, O.A., Burdin, A.M., Lang, A.R. and Brownell, R.L. Jr. 2017. Population assessment update for Sakhalin gray whales, with reference to stock identity. Paper SC/67a/NH/11 presented to the International Whaling Commission.
Cetacean - large whale	Eubalaena glacialis	North Atlantic Right Whale	Western North Atlantic	Indiv ID			Pace et al. 2017	Pace, R.M., III, P.J. Corkeron and S.D. Kraus. 2017. State space mark-recapture estimates reveal a recent decline in abundance of North Atlantic right whales. Ecol. And Evol. 7:8730–8741. DOI: 10.1002/ece3.3406
Cetacean - large whale	Eubalaena japonica	North Pacific Right Whale	Eastern North Pacific	Indiv ID			Wade et al. 2011	Wade, P. R., A. Kennedy, R. LeDuc, J. Barlow, J. Carretta, K. Shelden, W. Perryman, R. Pitman, K. Robertson, B. Rone, J. C. Salinas, A. Zerbini, R. L. Brownell, Jr., and P. Clapham. 2011. The world’s smallest whale population. Biol. Lett. 7:83-85.
Cetacean - large whale	Megaptera novaeangliae	Humpback Whale	American Samoa Stock	Indiv ID			J. Robbins, personal communication	J. Robbins, personal communication
Cetacean - large whale	Megaptera novaeangliae	Humpback Whale	Central North Pacific	Indiv ID			Baker et al. (2008, 2013), Fleming and Jackson (2011).	Baker, C. S., D. Steel, J. Calambokidis, J. Barlow, A. M. Burdin, P. J. Clapham, E. A. Falcone, J. K. B. Ford, C. M. Gabriele, U. González-Peral, R. LeDuc, D. Mattila, T. J. Quinn, L. Rojas-Bracho, J. M. Straley, B. L. Taylor, J. Urbán-R., M. Vant, P. Wade, D. Weller, B. H. Witteveen, K. Wynne, and M. Yamaguchi. 2008. geneSPLASH: an initial, ocean-wide survey of mitochondrial (mt) DNA diversity…
Cetacean - large whale	Megaptera novaeangliae	Humpback Whale	Western North Pacific	Indiv ID			Baker et al. (2008, 2013), Fleming and Jackson (2011).	Baker, C. S., D. Steel, J. Calambokidis, J. Barlow, A. M. Burdin, P. J. Clapham, E. A. Falcone, J. K. B. Ford, C. M. Gabriele, U. González-Peral, R. LeDuc, D. Mattila, T. J. Quinn, L. Rojas-Bracho, J. M. Straley, B. L. Taylor, J. Urbán-R., M. Vant, P. Wade, D. Weller, B. H. Witteveen, K. Wynne, and M. Yamaguchi. 2008. geneSPLASH: an initial, ocean-wide survey of mitochondrial (mt) DNA diversity…
Cetacean - large whale	Megaptera novaeangliae	Humpback Whale	California/Oregon/Washington Stock	Indiv ID			Calambokidis et al. 2017	Calambokidis, J., J. Barlow, K. Flynn, E. Dobson, and G.H. Steiger. 2017. Update on abundance, trends, and migrations of humpback whales along the US West Coast. International Whaling Commission Paper SC/A17/NP/13. 17 p.
Cetacean - large whale	Megaptera novaeangliae	Humpback whale	Gulf of Maine	Indiv ID			Robbins and Pace 2018	Robbins, J. and R.M. Pace, III. 2018. Trends in abundance of North Atlantic humpback whales in the Gulf of Maine. EE133F-17-SE-1320 Task I Contract Report. Northeast Fisheries Science Center, Woods Hole, MA.
Cetacean - large whale	Physeter macrocephalus	Sperm Whale	Puerto Rico and U.S. Virgin Islands Stock	NA
Cetacean - large whale	Physeter macrocephalus	Sperm Whale	Gulf of Mexico Stock	Ship or boat line-transect survey			Not listed in SAR
Cetacean - large whale	Physeter macrocephalus	Sperm Whale	Hawaii Stock	Ship or boat line-transect survey			Bradford et al. 2017	Bradford, A.L., K.A. Forney, J. E.M. Oleson, J. Barlow. 2017. Abundance estimates of cetaceans from a line-transect survey within the U.S Hawaiian Islands Exclusive Economic Zone. Fishery Bulletin 115: 129-142.
Cetacean - large whale	Physeter macrocephalus	Sperm Whale	North Atlantic	Ship or boat line-transect survey			Garrison 2020, Palka 2020	Garrison, L.P. 2020. Abundance of cetaceans along the southeast U.S. east coast from a summer 2016 vessel survey. Southeast Fisheries Science Center, Protected Resources and Biodiversity Division, 75 Virginia Beach Dr., Miami, FL 33140. PRD Contribution # PRD-2020-04, 17 pp. Palka, D. 2020. Cetacean abundance estimates in US northwestern Atlantic Ocean waters from summer 2016 line transect survey…
Cetacean - large whale	Physeter macrocephalus	Sperm Whale	North Pacific	Ship or boat line-transect survey			Rone et al. 2017	Rone, B. K., A. N. Zerbini, A. B. Douglas, D. W. Weller, and P. J. Clapham. 2017. Abundance and distribution of cetaceans in the Gulf of Alaska. Mar. Biol. 164:23. DOI: dx.doi.org/10.1007/s00227-016-3052-2 .
Cetacean - large whale	Physeter macrocephalus	Sperm Whale	California/Oregon/Washington Stocks	Ship or boat line-transect survey			Moore and Barlow 2017	Moore, J.E. and Barlow, J.P. 2017. Population abundance and trend estimates for beaked whales and sperm whales in the California Current based on ship-based visual line-transect survey data, 1991 – 2014. U.S. Department of Commerce, NOAA Technical Memorandum, NOAA-TM-SWFSC-585.
Cetacean - porpoise	Phocoena phocoena	Harbor Porpoise	Washington Inland Waters Stock	Aerial line-transect survey			Smultea et al. 2015a	Smultea, M. A., T. A. Jefferson, S. Courbis, G. Campbell, and J. Hopkins. 2015a. Harbor porpoise aerial surveys conducted in the Strait of Juan de Fuca and San Juan Islands of Washington in spring 2015. Draft Report. Prepared for the National Marine Mammal Laboratory, Alaska Fisheries Science Center, National Marine Fisheries Service, under Contract No. RA133F15SEO662, by Smultea Environmental Sc…
Cetacean - porpoise	Phocoena phocoena	Harbor Porpoise	Bering Sea	Aerial line-transect survey			Hobbs and Waite 2010	Hobbs, R. C., and J. M. Waite. 2010. Abundance of harbor porpoise (Phocoena phocoena) in three Alaskan regions, corrected for observer errors due to perception bias and species misidentification, and corrected for animals submerged from view. Fish. Bull., U.S. 108(3):251-267.
Cetacean - porpoise	Phocoena phocoena	Harbor Porpoise	Gulf of Alaska	Aerial line-transect survey			Hobbs and Waite 2010	Hobbs, R. C., and J. M. Waite. 2010. Abundance of harbor porpoise (Phocoena phocoena) in three Alaskan regions, corrected for observer errors due to perception bias and species misidentification, and corrected for animals submerged from view. Fish. Bull., U.S. 108(3):251-267.
Cetacean - porpoise	Phocoena phocoena	Harbor Porpoise	Monterey Bay Stock	Aerial line-transect survey			Forney et al. 2019	Forney, K.A., J.E. Moore, J. Barlow, J.V. Carretta and S.R. Benson. 2019. A multi-decadal Bayesian trend analysis of harbor porpoise (Phocoena phocoena) populations off California relative to past fishery bycatch. Draft Document PSRG-2019-08 presented to the Pacific Scientific Review Group, 5-7 March 2019, Olympia, WA. 22 p.
Cetacean - porpoise	Phocoena phocoena	Harbor Porpoise	Morro Bay Stock	Aerial line-transect survey			Forney et al. 2014	Forney K.A., J.V. Carretta, S.R. Benson. 2014. Preliminary estimates of harbor porpoise abundance in Pacific Coast waters of California, Oregon and Washington, 2007-2012. U.S. Dep. Commer., NOAA Tech Memo NMFS-SWFSC-537. 21 p.
Cetacean - porpoise	Phocoena phocoena	Harbor Porpoise	Northern California/Southern Oregon Stock	Aerial line-transect survey			Forney et al. 2019	Forney, K.A., J.E. Moore, J. Barlow, J.V. Carretta and S.R. Benson. 2019. A multi-decadal Bayesian trend analysis of harbor porpoise (Phocoena phocoena) populations off California relative to past fishery bycatch. Draft Document PSRG-2019-08 presented to the Pacific Scientific Review Group, 5-7 March 2019, Olympia, WA. 22 p.
Cetacean - porpoise	Phocoena phocoena	Harbor Porpoise	Northern Oregon/Washington Coast Stock	Aerial line-transect survey			Forney et al. 2013	Forney, K. A., J.V. Carretta, and S. R. Benson. 2013. Preliminary estimates of harbor porpoise abundance in Pacific Coast waters of California, Oregon and Washington, 2007-2012. Draft Document PSRG- 2013-10 submitted to the Pacific Scientific Review Group, 2-4 April 2013, San Diego, CA.
Cetacean - porpoise	Phocoena phocoena	Harbor Porpoise	San Francisco-Russian River Stock	Aerial line-transect survey			Forney et al. 2019	Forney, K.A., J.E. Moore, J. Barlow, J.V. Carretta and S.R. Benson. 2019. A multi-decadal Bayesian trend analysis of harbor porpoise (Phocoena phocoena) populations off California relative to past fishery bycatch. Draft Document PSRG-2019-08 presented to the Pacific Scientific Review Group, 5-7 March 2019, Olympia, WA. 22 p.
Cetacean - porpoise	Phocoena phocoena	Harbor Porpoise	Gulf of Maine/Bay of Fundy Stock	Ship or boat line-transect survey	Aerial line-transect survey		Palka 2012	Palka, D.L. 2012. Cetacean abundance estimates in US northwestern Atlantic Ocean waters from summer 2011 line transect survey. Northeast Fish. Sci. Cent. Ref. Doc. 12-29. 37 pp. https://repository.library.noaa.gov/view/noaa/4312
Cetacean - porpoise	Phocoena phocoena	Harbor Porpoise	Southeast Alaska	Ship or boat line-transect survey			Dahlheim et al. 2015	Dahlheim, M. E., A. N. Zerbini, J. M. Waite, and A. S. Kennedy. 2015. Temporal changes in abundance of harbor porpoise (Phocoena phocoena) inhabiting the inland waters of Southeast Alaska. Fish. Bull., U.S. 113(3):242-255
Cetacean - porpoise	Phocoenoides dalli	Dall's Porpoise	California/Oregon/Washington Stock	Ship or boat line-transect survey			Barlow 2016	Barlow, J. 2016. Cetacean abundance in the California current estimated from ship-based line-transect surveys in 1991-2014. Southwest Fisheries Science Center, Administrative Report, LJ-2016-01. 63 p.Becker, E.A., K.A. Forney, M.C. Ferguson, J. Barlow, J.V. Redfern. 2012. Predictive Modeling of Cetacean Densities in the California Current Ecosystem based on Summer/Fall Ship Surveys in 1991- 2008.…
Cetacean - porpoise	Phocoenoides dalli	Dall’s Porpoise	Alaska Stock	Ship or boat line-transect survey			Hobbs and Lerczak 1993	Hobbs, R. C., and J. A. Lerczak. 1993. Abundance of Pacific white-sided dolphin and Dall’s porpoise in Alaska estimated from sightings in the North Pacific Ocean and the Bering Sea during 1987 through 1991. Annual Report to the MMPA Assessment Program, Office of Protected Resources, NMFS, NOAA, 1335 East-West Highway, Silver Spring, MD 20910.
Cetacean - small whale	Berardius bairdii	Baird's Beaked Whale	California/Oregon/Washington Stock	Ship or boat line-transect survey			Moore and Barlow 2017	Moore, J.E. and Barlow, J.P. 2017. Population abundance and trend estimates for beaked whales and sperm whales in the California Current based on ship-based visual line-transect survey data, 1991 – 2014. U.S. Department of Commerce, NOAA Technical Memorandum, NOAA-TM-SWFSC-585. 16 p.
Cetacean - small whale	Berardius bairdii	Baird’s Beaked Whale	Alaska Stock	NA
Cetacean - small whale	Delphinapterus leucas	Beluga Whale	Beaufort Sea	Aerial line-transect survey			Harwood et al. 1996	Harwood, L. A., S. Innes, P. Norton, and M. C. S. Kingsley. 1996. Distribution and abundance of beluga whales in the Mackenzie Estuary, southeast Beaufort Sea and west Amundsen Gulf during late July 1992. Can. J. Fish. Aquat. Sci. 53:2262-2273.
Cetacean - small whale	Delphinapterus leucas	Beluga Whale	Bristol Bay	Aerial line-transect survey			Lowry et al. 2008	Lowry, L. F., K. J. Frost, A. Zerbini, D. DeMaster, and R. R. Reeves. 2008. Trend in aerial counts of beluga or white whales (Delphinapterus leucas) in Bristol Bay, Alaska, 1993-2005. J. Cetacean Res. Manage. 10(3):201-207.
Cetacean - small whale	Delphinapterus leucas	Beluga Whale	Eastern Bering	Aerial line-transect survey			Lowry et al. 2017	Lowry, L. F., A. Zerbini, K. J. Frost, D. P. DeMaster, and R. C. Hobbs. 2017. Development of an abundance estimate for the Eastern Bering Sea stock of beluga whales (Delphinapterus leucas). J. Cetacean Res. Manage. 16:39-47.
Cetacean - small whale	Delphinapterus leucas	Beluga Whale	Eastern Chukchi	Aerial line-transect survey			Lowry et al. 2017	Lowry, L. F., A. Zerbini, K. J. Frost, D. P. DeMaster, and R. C. Hobbs. 2017. Development of an abundance estimate for the Eastern Bering Sea stock of beluga whales (Delphinapterus leucas). J. Cetacean Res. Manage. 16:39-47.
Cetacean - small whale	Delphinapterus leucas	Beluga Whale	Cook Inlet	Other		Aerial survey to census groups, with video estimation of group size	Hobbs et al. 2000	Hobbs, R. C., J. M. Waite, and D. J. Rugh. 2000. Beluga, Delphinapterus leucas, group sizes in Cook Inlet, Alaska, based on observer counts and aerial video. Mar. Fish. Rev. 62(3):46-59.
Cetacean - small whale	Feresa attenuata	Pygmy Killer Whale	Western North Atlantic	NA
Cetacean - small whale	Feresa attenuata	Pygmy Killer Whale	Gulf of Mexico Stock	Ship or boat line-transect survey			Not listed in SAR
Cetacean - small whale	Feresa attenuata	Pygmy Killer Whale	Hawaii Stock	Ship or boat line-transect survey			Bradford et al. 2017	Bradford, A.L., K.A. Forney, J. E.M. Oleson, J. Barlow. 2017. Abundance estimates of cetaceans from a line-transect survey within the U.S Hawaiian Islands Exclusive Economic Zone. Fishery Bulletin 115: 129-142.
Cetacean - small whale	Globicephala macrorhynchus	Short-Finned Pilot Whale	Puerto Rico and U.S. Virgin Islands Stock	NA
Cetacean - small whale	Globicephala macrorhynchus	Short-Finned Pilot Whale	California/Oregon/Washington	Ship or boat line-transect survey			Barlow 2016	Barlow, J. 2016. Cetacean abundance in the California current estimated from ship-based line-transect surveys in 1991-2014. Southwest Fisheries Science Center, Administrative Report, LJ-2016-01. 63 p.Becker, E.A., K.A. Forney, M.C. Ferguson, J. Barlow, J.V. Redfern. 2012. Predictive Modeling of Cetacean Densities in the California Current Ecosystem based on Summer/Fall Ship Surveys in 1991- 2008.…
Cetacean - small whale	Globicephala macrorhynchus	Short-Finned Pilot Whale	Gulf of Mexico Stock	Ship or boat line-transect survey			Not listed in SAR
Cetacean - small whale	Globicephala macrorhynchus	Short-Finned Pilot Whale	Hawaii Stock	Ship or boat line-transect survey			Bradford et al. 2017	Bradford, A.L., K.A. Forney, J. E.M. Oleson, J. Barlow. 2017. Abundance estimates of cetaceans from a line-transect survey within the U.S Hawaiian Islands Exclusive Economic Zone. Fishery Bulletin 115: 129-142.
Cetacean - small whale	Globicephala macrorhynchus	Short-Finned Pilot Whale	Western North Atlantic	Ship or boat line-transect survey			Palka 2012, Garrison 2016, Garrison and Rosel 2017, Garrison and Palka 2018	Palka, D. 2012. Cetacean abundance estimates in US northwestern Atlantic Ocean waters from summer 2011 line transect survey. Northeast Fish. Sci. Cent. Ref. Doc. 12-29. 37 pp. https://repository.library.noaa.gov/view/noaa/4312; Garrison, L.P. 2016. Abundance of marine mammals in waters of the U.S. East Coast during summer 2011. Southeast Southeast Fisheries Science Center, Protected Resources and…
Cetacean - small whale	Globicephala macrorhynchus	Short-Finned Pilot Whale	Western North Atlantic Stock	Ship or boat line-transect survey			Palka 2012; Garrison 2016	Palka, D. 2012. Cetacean abundance estimates in US northwestern Atlantic Ocean waters from summer 2011 line transect survey. Northeast Fish. Sci. Cent. Ref. Doc. 12-29. 37 pp.; Garrison, L.P. 2016. Abundance of marine mammals in waters of the U.S. East Coast during summer 2011. Southeast Fisheries Science Center, Protected Resources and Biodiversity Division, 75 Virginia Beach Dr., Miami, FL 3314…
Cetacean - small whale	Globicephala melas	Long-finned pilot whale	Western North Atlantic Stock	Ship or boat line-transect survey	Aerial line-transect survey		Garrison 2020; Palka 2020; Lawson and Gosselin 2018	Garrison, L.P. 2020. Abundance of cetaceans along the southeast U.S. east coast from a summer 2016 vessel survey. Southeast Fisheries Science Center, Protected Resources and Biodiversity Division, 75 Virginia Beach Dr., Miami, FL 33140. PRD Contribution # PRD-2020-04, 17 pp. Palka, D. 2020. Cetacean abundance estimates in US northwestern Atlantic Ocean waters from summer 2016 line transect survey…
Cetacean - small whale	Hyperoodon ampullatus	Northern bottlenose whale	Western North Atlantic Stock	NA
Cetacean - small whale	Indopacetus pacificus	Longman's Beaked Whale	Hawaii Stock	Ship or boat line-transect survey			Bradford et al. 2017	Bradford, A.L., K.A. Forney, J. E.M. Oleson, J. Barlow. 2017. Abundance estimates of cetaceans from a line-transect survey within the U.S Hawaiian Islands Exclusive Economic Zone. Fishery Bulletin 115: 129-142.
Cetacean - small whale	Kogia breviceps	Pygmy Sperm Whale	Western North Atlantic	Ship or boat line-transect survey			Garrison 2020, Palka 2022	Garrison, L.P. 2020. Abundance of cetaceans along the southeast U.S. east coast from a summer 2016 vessel survey. Southeast Fisheries Science Center, Protected Resources and Biodiversity Division, 75 Virginia Beach Dr., Miami, FL 33140. PRD Contribution # PRD-2020-04, 17 pp. Palka, D. 2020. Cetacean abundance estimates in US northwestern Atlantic Ocean waters from summer 2016 line transect survey…
Cetacean - small whale	Kogia breviceps	Pygmy Sperm Whale	Hawaii Stock	NA
Cetacean - small whale	Kogia breviceps	Pygmy Sperm Whale	California/Oregon/Washington Stocks	Ship or boat line-transect survey			Barlow 2016	Barlow, J. 2016. Cetacean abundance in the California current estimated from ship-based line-transect surveys in 1991-2014. Southwest Fisheries Science Center, Administrative Report, LJ-2016-01. 63 p.Becker, E.A., K.A. Forney, M.C. Ferguson, J. Barlow, J.V. Redfern. 2012. Predictive Modeling of Cetacean Densities in the California Current Ecosystem based on Summer/Fall Ship Surveys in 1991- 2008.…
Cetacean - small whale	Kogia breviceps	Pygmy Sperm Whale	Gulf of Mexico Stock	Ship or boat line-transect survey			Not listed in SAR
Cetacean - small whale	Kogia sima	Dwarf Sperm Whale	Gulf of Mexico Stock	Ship or boat line-transect survey			Not listed in SAR	Not listed in SAR
Cetacean - small whale	Kogia sima	Dwarf Sperm Whale	Hawaii Stock	Ship or boat line-transect survey			Barlow 2006	Barlow, J. 2006. Cetacean abundance in Hawaiian waters estimated from a summer/fall survey in 2002. Marine Mammal Science 22: 446–464.
Cetacean - small whale	Kogia sima	Dwarf Sperm Whale	California/Oregon/Washington Stocks	NA
Cetacean - small whale	Kogia sima	Dwarf Sperm Whale	Western North Atlantic	Ship or boat line-transect survey	Aerial line-transect survey		Garrison 2020, Palka 2020	Garrison, L.P. 2020. Abundance of cetaceans along the southeast U.S. east coast from a summer 2016 vessel survey. Southeast Fisheries Science Center, Protected Resources and Biodiversity Division, 75 Virginia Beach Dr., Miami, FL 33140. PRD Contribution # PRD-2020-04, 17 pp. Palka, D. 2020. Cetacean abundance estimates in US northwestern Atlantic Ocean waters from summer 2016 line transect survey…
Cetacean - small whale	Mesoplodon bidens	Sowerby’s beaked whale	Western North Atlantic	Ship or boat line-transect survey			Garrison 2020, Palka 2021	Garrison, L.P. 2020. Abundance of cetaceans along the southeast U.S. east coast from a summer 2016 vessel survey. Southeast Fisheries Science Center, Protected Resources and Biodiversity Division, 75 Virginia Beach Dr., Miami, FL 33140. PRD Contribution # PRD-2020-04, 17 pp. Palka, D. 2020. Cetacean abundance estimates in US northwestern Atlantic Ocean waters from summer 2016 line transect survey…
Cetacean - small whale	Mesoplodon densirostris	Blainville's Beaked Whale	Gulf of Mexico Stock	Ship or boat line-transect survey			Not listed in SAR	Not listed in SAR
Cetacean - small whale	Mesoplodon densirostris	Blainville's Beaked Whale	Hawaii Stock	Ship or boat line-transect survey			Bradford et al. 2017	Bradford, A.L., K.A. Forney, J. E.M. Oleson, J. Barlow. 2017. Abundance estimates of cetaceans from a line-transect survey within the U.S Hawaiian Islands Exclusive Economic Zone. Fishery Bulletin 115: 129-142.
Cetacean - small whale	Mesoplodon densirostris	Blainville's Beaked Whale	Western North Atlantic	Ship or boat line-transect survey			Garrison 2020, Palka 2022	Garrison, L.P. 2020. Abundance of cetaceans along the southeast U.S. east coast from a summer 2016 vessel survey. Southeast Fisheries Science Center, Protected Resources and Biodiversity Division, 75 Virginia Beach Dr., Miami, FL 33140. PRD Contribution # PRD-2020-04, 17 pp. Palka, D. 2020. Cetacean abundance estimates in US northwestern Atlantic Ocean waters from summer 2016 line transect survey…
Cetacean - small whale	Mesoplodon europaeus	Gervais beaked whale	Gulf of Mexico Stock	Ship or boat line-transect survey			Not listed in SAR	Not listed in SAR
Cetacean - small whale	Mesoplodon europaeus	Gervais beaked whale	Western North Atlantic	Ship or boat line-transect survey			Garrison 2020, Palka 2020	Garrison, L.P. 2020. Abundance of cetaceans along the southeast U.S. east coast from a summer 2016 vessel survey. Southeast Fisheries Science Center, Protected Resources and Biodiversity Division, 75 Virginia Beach Dr., Miami, FL 33140. PRD Contribution # PRD-2020-04, 17 pp. Palka, D. 2020. Cetacean abundance estimates in US northwestern Atlantic Ocean waters from summer 2016 line transect survey…
Cetacean - small whale	Mesoplodon mirus	True’s beaked whale	Western North Atlantic	Ship or boat line-transect survey			Garrison 2020, Palka 2022	Garrison, L.P. 2020. Abundance of cetaceans along the southeast U.S. east coast from a summer 2016 vessel survey. Southeast Fisheries Science Center, Protected Resources and Biodiversity Division, 75 Virginia Beach Dr., Miami, FL 33140. PRD Contribution # PRD-2020-04, 17 pp. Palka, D. 2020. Cetacean abundance estimates in US northwestern Atlantic Ocean waters from summer 2016 line transect survey…
Cetacean - small whale	Mesoplodon spp.	Mesoplodon Beaked Whales	Western North Atlantic	Aerial line-transect survey			Palka 2006	Palka, D. L. 2006. Summer abundance estimates of cetaceans in US North Atlantic Navy Operating Areas. Northeast Fish. Sci. Cent. Ref. Doc. 06-03. 41 pp. http://www.nefsc.noaa.gov/nefsc/publications/crd/crd0603/crd0603.pdf
Cetacean - small whale	Mesoplodon spp.	Mesoplodon Beaked Whales	California/Oregon/Washington Stocks	Ship or boat line-transect survey			Moore and Barlow 2017	Moore, J.E. and Barlow, J.P. 2017. Population abundance and trend estimates for beaked whales and sperm whales in the California Current based on ship-based visual line-transect survey data, 1991 – 2014. U.S. Department of Commerce, NOAA Technical Memorandum, NOAA-TM-SWFSC-585. 16 p.
Cetacean - small whale	Mesoplodon stejnegeri	Stejneger’s Beaked Whale	Alaska Stock	NA
Cetacean - small whale	Monodon monoceros	Narwhal	Alaska Stock	NA
Cetacean - small whale	Orcinus orca	Killer Whale	Eastern North Pacific Offshore Stock	Indiv ID			Ford et al. 2014	Ford, J.K.B., Stredulinsky, E.H., Ellis, G.M., Durban, J.W., Pilkington, J.F., 2014. Offshore Killer Whales in Canadian Pacific Waters: Distribution, Seasonality, Foraging Ecology, Population Status and Potential for Recovery. DFO Canadian Science Advisory Secretariat Research Document 2014/088. p. vii + 55.
Cetacean - small whale	Orcinus orca	Killer Whale	Eastern North Pacific Southern Resident Stock	Indiv ID			Center for Whale Research 2018
Cetacean - small whale	Orcinus orca	Killer Whale	AT1 Transient	Indiv ID			Matkin et al. 2008	Matkin, C. O., E. L. Saulitis, G. M. Ellis, P. Olesiuk, and S. D. Rice. 2008. Ongoing population-level impacts on killer whales Orcinus orca following the ‘Exxon Valdez’ oil spill in Prince William Sound, Alaska. Mar. Ecol. Prog. Ser. 356:269-281.
Cetacean - small whale	Orcinus orca	Killer Whale	Eastern North Pacific Alaska Resident	Indiv ID			Matkin et al. in prep.	Matkin et al. in prep., 2001-2012 MML/NGOS unpublished catalog2
Cetacean - small whale	Orcinus orca	Killer Whale	Eastern North Pacific Gulf of Alaska, Aleutian Islands, and Bering Sea Transient	Indiv ID			Matkin et al. in prep.
Cetacean - small whale	Orcinus orca	Killer Whale	Eastern North Pacific Northern Resident	Indiv ID			Fisheries and Oceans Canada. 2019.	Fisheries and Oceans Canada. 2019. Population status update for the Northern Resident killer whale (Orcinus orca) in 2018. DFO Canadian Science Advisory Secretariat Science Response 2019/025. 13 p.
Cetacean - small whale	Orcinus orca	Killer Whale	West Coast Transient	Indiv ID			DFO 2009	Department of Fisheries and Oceans (DFO) Canada. 2009. Recovery Potential Assessment for West Coast Transient Killer Whales. DFO Can. Sci. Advis. Sec. Sci. Advis. Rep. 2009/039.
Cetacean - small whale	Orcinus orca	Killer Whale	Western North Atlantic Stock	NA
Cetacean - small whale	Orcinus orca	Killer Whale	Gulf of Mexico Stock	Ship or boat line-transect survey			Not listed in SAR	Not listed in SAR
Cetacean - small whale	Orcinus orca	Killer Whale	Hawaii Stock	Ship or boat line-transect survey			Bradford et al. 2017	Bradford, A.L., K.A. Forney, J. E.M. Oleson, J. Barlow. 2017. Abundance estimates of cetaceans from a line-transect survey within the U.S Hawaiian Islands Exclusive Economic Zone. Fishery Bulletin 115: 129-142.
Cetacean - small whale	Peponocephala electra	Melon-Headed Whale	Hawaiian Islands And Kohala Resident Stocks	Indiv ID			Achettino 2010	Aschettino, J.M. 2010. Population size and structure of melon-headed whales (Peponocephala electra) around the main Hawaiian Islands: evidence of multiple populations based on photographic data. Master’s Thesis. Hawaii Pacific University.
Cetacean - small whale	Peponocephala electra	Melon-Headed Whale	Kohala Resident Stock	NA
Cetacean - small whale	Peponocephala electra	Melon-Headed Whale	Western North Atlantic	NA
Cetacean - small whale	Peponocephala electra	Melon-Headed Whale	Gulf of Mexico Stock	Ship or boat line-transect survey			Not listed in SAR	Not listed in SAR
Cetacean - small whale	Pseudorca crassidens	False Killer Whale	Western North Atlantic	Ship or boat line-transect survey			Garrison 2020, Palka 2020	Garrison, L.P. 2020. Abundance of cetaceans along the southeast U.S. east coast from a summer 2016 vessel survey. Southeast Fisheries Science Center, Protected Resources and Biodiversity Division, 75 Virginia Beach Dr., Miami, FL 33140. PRD Contribution # PRD-2020-04, 17 pp. Palka, D. 2020. Cetacean abundance estimates in US northwestern Atlantic Ocean waters from summer 2016 line transect survey…
Cetacean - small whale	Pseudorca crassidens	False Killer Whale	American Samoa Stock	NA
Cetacean - small whale	Pseudorca crassidens	False Killer Whale	Gulf of Mexico Stock	NA
Cetacean - small whale	Pseudorca crassidens	False Killer Whale	Hawaii Pelagic Stock	Ship or boat line-transect survey			Bradford et al. 2014, 2015	Bradford, A.L., K.A. Forney, E.M. Oleson, and J. Barlow. 2014. Accounting for subgroup structure in line-transect abundance estimates of false killer whales (Pseudorca crassidens) in Hawaiian waters. PLoS ONE 9(2): e90464. doi:10.1371/journal.pone.0090464. Bradford, A.L., E.M. Oleson, R.W. Baird, C.H. Boggs, K.A. Forney, and N.C. Young. 2015. Revised stock boundaries for false killer whales (Pseu…
Cetacean - small whale	Pseudorca crassidens	False Killer Whale	Main Hawaiian Islands Insular Stock	Ship or boat line-transect survey			Bradford et al 2018	Bradford, A.L., R.W. Baird. S.D. Mahaffy, A.M. Gorgone, D.J. McSweeney, T. Cullins, D.L. Webster, and A.N. Zerbini. 2018. Abundance estimates for management of endangered false killer whales in the main Hawaiian Islands. Endangered Species Research. doi: 10.3354/esr00903.
Cetacean - small whale	Pseudorca crassidens	False Killer Whale	Northwestern Hawaiian Islands Stock	Ship or boat line-transect survey			Bradford et al. 2015	Bradford, A.L., E.M. Oleson, R.W. Baird, C.H. Boggs, K.A. Forney, and N.C. Young. 2015. Revised stock boundaries for false killer whales (Pseudorca crassidens) in Hawaiian waters. U.S Dep. Commerc. NOAA Tech Memo., NOAA-TM-NMFS-PIFSC-47. 29p.
Cetacean - small whale	Pseudorca crassidens	False Killer Whale	Palmyra Atoll Stock	Ship or boat line-transect survey			Barlow & Rankin 2007	Barlow, J. and S. Rankin. 2007. False killer whale abundance and density: Preliminary estimates for the PICEAS study area south of Hawaii and new estimates for the US EEZ around Hawaii. Administrative Report LJ-07-02. Southwest Fisheries Science Center, National Marine Fisheries Service, 8604 La Jolla Shores Drive, La Jolla, CA 92037.
Cetacean - small whale	Ziphius cavirostris	Cuvier's Beaked Whale	Hawaii Pelagic Stock	NA
Cetacean - small whale	Ziphius cavirostris	Cuvier's Beaked Whale	Puerto Rico and U.S. Virgin Islands Stock	NA
Cetacean - small whale	Ziphius cavirostris	Cuvier’s Beaked Whale	Alaska Stock	NA
Cetacean - small whale	Ziphius cavirostris	Cuvier's Beaked Whale	Hawaii Stock	Ship or boat line-transect survey			Bradford et al. 2017	Bradford, A.L., K.A. Forney, J. E.M. Oleson, J. Barlow. 2017. Abundance estimates of cetaceans from a line-transect survey within the U.S Hawaiian Islands Exclusive Economic Zone. Fishery Bulletin 115: 129-142.
Cetacean - small whale	Ziphius cavirostris	Cuvier's Beaked Whale	Northern Gulf of Mexico Stock	Ship or boat line-transect survey			Not listed in SAR	Not listed in SAR
Cetacean - small whale	Ziphius cavirostris	Cuvier's Beaked Whale	Western North Atlantic	Ship or boat line-transect survey			Garrison 2020, Palka 2021	Garrison, L.P. 2020. Abundance of cetaceans along the southeast U.S. east coast from a summer 2016 vessel survey. Southeast Fisheries Science Center, Protected Resources and Biodiversity Division, 75 Virginia Beach Dr., Miami, FL 33140. PRD Contribution # PRD-2020-04, 17 pp. Palka, D. 2020. Cetacean abundance estimates in US northwestern Atlantic Ocean waters from summer 2016 line transect survey…
Cetacean - small whale	Ziphius cavirostris	Cuvier's Beaked Whale	California/Oregon/Washington Stocks	Ship or boat line-transect survey	Aerial line-transect survey		Barlow 2016	Barlow, J. 2016. Cetacean abundance in the California current estimated from ship-based line-transect surveys in 1991-2014. Southwest Fisheries Science Center, Administrative Report, LJ-2016-01. 63 p.Becker, E.A., K.A. Forney, M.C. Ferguson, J. Barlow, J.V. Redfern. 2012. Predictive Modeling of Cetacean Densities in the California Current Ecosystem based on Summer/Fall Ship Surveys in 1991- 2008.…
Pinnipeds- Otariids	Arctocephalus townsendi	Guadalupe Fur Seal	Mexico to California Stock	Pup counts (from any platform)			García- Aguilar et al. 2018	García-Aguilar, M.C., F.R. Elorriaga-Verplancken, H. Rosales-Nanduca, and Y. Schramm. 2018. Population status of the Guadalupe fur seal (Arctocephalus townsendi). Journal of Mammalogy, 99(6):1522– 1528, 2018.García-Capitanachi, B. 2011. Estado de la población de lobo fino de Guadalupe (Arctocephalus townsendi) en Isla Guadalupe e Islas San Benito. MC Thesis dissertation. Facultad de Ciencias U…
Pinnipeds- Otariids	Callorhinus ursinus	Northern Fur Seal	Eastern Pacific	Indiv ID	Pup counts (from any platform)		Chapman and Johnson 1968, York and Kozloff 1987, Towell et al. 2006	Chapman, D. G., and A. M. Johnson. 1968. Estimation of fur seal pup populations by randomized sampling. Trans. Am. Fish. Soc. 97:264-270, York, A. E., and P. Kozloff. 1987. On estimating the number of fur seal pups born on St. Paul Island, 1980-86. Fish. Bull., U.S. 85:367-375, Towell, R. G., R. R. Ream, and A. E. York. 2006. Decline in northern fur seal (Callorhinus ursinus) pup production on th…
Pinnipeds- Otariids	Callorhinus ursinus	Northern Fur Seal	California Stock	Pup counts (from any platform)			Tietz 2012, Berger et al. 2013, Orr et al. in review	Tietz, J.R. 2012. Pinniped surveys on West End Island, Farallon National Wildlife Refuge 2011. Unpublished report to the U.S. Fish and Wildlife Service. PRBO Contribution Number 1853. PRBO Conservation Science, Petaluma, California; Berger, R. W., R. W. Bradley, G. J. McChesney, J. R. Tietz, and M. S. Lowry. 2013 Comparison of aerial photographic and land-based surveys of northern fur seals on th…
Pinnipeds- Otariids	Eumetopias jubatus	Steller Sea Lion	Eastern U.S.	All-age haul out count (from any platform)			Sweeney et al. 2017, Olesiuk 2018, Washington Department of Fish and Wildlife, unpubl. Data, NMFS and Oregon Department of Fish and Game, unpubl. Data	Olesiuk, P. F. 2018. Recent trends in abundance of Steller sea lions (Eumetopias jubatus) in British Columbia. DFO Can. Sci. Advis. Sec. Res. Doc. 2018/006. v + 67 p. Sweeney, K., L. Fritz, R. Towell, and T. Gelatt. 2017. Results of Steller sea lion surveys in Alaska, June-July 2017. Memorandum to the Record, December 5, 2017. Available from Marine Mammal Laboratory, AFSC, NMFS, 7600 Sand Point W…
Pinnipeds- Otariids	Eumetopias jubatus	Steller Sea Lion	Western U.S.	All-age haul out count (from any platform)			Sweeney et al. 2018	Sweeney, K., R. Towell, and T. Gelatt. 2018. Results of Steller sea lion surveys in Alaska, June-July 2018. Memorandum to the Record, December 5, 2018. Available from Marine Mammal Laboratory, AFSC, NMFS, 7600 Sand Point Way NE, Seattle, WA 98115.
Pinnipeds- Otariids	Zalophus Californianus Californianus	California Sea Lion	U.S. Stock	Pup counts (from any platform)			Laake et al. 2018	Laake, J.L., M.S. Lowry, R.L. DeLong, S.R. Melin, and J.V. Carretta. 2018. Population growth and status of California sea lions. The Journal of Wildlife Management, DOI: 10.1002/jwmg.21405.
Pinnipeds- Phocids	Cystophora cristata	Hooded seal	Western North Atlantic Stock	Pup counts (from any platform)
Pinnipeds- Phocids	Erignathus barbatus	Bearded Seal	Alaska Stock	Aerial line-transect survey	Other	Multiple methods involving aerial strip transect survey using photographs and thermal imaging, with substantial modeling including spatial regression, species misclassification, and probability of detection.	Conn et al. 2014	Conn, P. B., J. M. Ver Hoef, B. T. McClintock, E. E. Moreland, J. M. London, M. F. Cameron, S. P. Dahle, and P. L. Boveng. 2014. Estimating multispecies abundance using automated detection systems: ice-associated seals in the Bering Sea. Methods Ecol. Evol. 5:1280-1293. DOI: dx.doi.org/10.1111/2041-210X.12127 .
Pinnipeds- Phocids	Halichoerus grypus	Gray seal	Western North Atlantic	Pup counts (from any platform)			denHeyer et al. 2017	den Heyer, C.E., Lang, S.L.C., Bowen, W.D., and Hammill, M.O. 2017. Pup production at Scotian Shelf grey seal (Halichoerus grypus) colonies in 2016. DFO Can. Sci. Advis. Sec. Res. Doc. 2017/056. v + 34 p.DFO [Dept. of Fisheries and Oceans]. 2011. Stock assessment of Northwest Atlantic grey seals (Halichoerus grypus), Can. Sci. Advis. Sec. Advis. Rep. 2010/091 12 pp.
Pinnipeds- Phocids	Histriophoca fasciata	Ribbon Seal	Alaska Stock	Aerial line-transect survey	Other	Multiple methods involving aerial strip transect survey using photographs and thermal imaging, with substantial modeling including spatial regression, species misclassification, and probability of detection.	Conn et al. 2014	Conn, P. B., J. M. Ver Hoef, B. T. McClintock, E. E. Moreland, J. M. London, M. F. Cameron, S. P. Dahle, and P. L. Boveng. 2014. Estimating multispecies abundance using automated detection systems: ice-associated seals in the Bering Sea. Methods Ecol. Evol. 5:1280-1293. DOI: dx.doi.org/10.1111/2041-210X.12127 .
Pinnipeds- Phocids	Mirounga angustirostris	Northern Elephant Seal	California Breeding Stock	Pup counts (from any platform)			Lowry et al. 2014	Lowry, M.S., R. Condit, B.Hatfield, S.G. Allen, R. Berger, P.A. Morris, B.J. Le Boeuf, and J. Reiter. 2014. Abundance, Distribution, and Population Growth of the Northern Elephant Seal (Mirounga angustirostris) in the United States from 1991 to 2010. Aquatic Mammals 40(1):20-31.
Pinnipeds- Phocids	Neomonachus schauinslandi	Hawaiian Monk Seal	Hawaii Stock	Indiv ID	All-age haul out count (from any platform)	Combination of several methods, including mark recapture, discovery curve analysis, direct counts, min counts with correction for at sea.	Baker et al. 2016, Harting et al. 2017	Baker J.D., A.L. Harting, T.C. Johanos, and C.L. Littnan. 2016. Estimating Hawaiian monk seal range-wide abundance and associated uncertainty. Endang. Species Res. 31:317-324; Harting AL, Baker JD, Johanos TC. 2017. Estimating population size for Hawaiian monk seals using haulout data. J. Wildl. Manage. 81:1202-9.
Pinnipeds- Phocids	Pagophilus groenlandicus	Harp seal	Western North Atlantic	Pup counts (from any platform)			Hammill et al. 2014	Hammill, M.O., Stenson, G.B., Mosnier A., and Doniol-Valcroze, T. 2014. Abundance estimates of Northwest Atlantic harp seals and management advice for 2014. DFO Can. Sci. Advis. Sec. Res. Doc. 2014/022. v + 33 p
Pinnipeds- Phocids	Phoca largha	Spotted Seal	Bering Stock	Aerial line-transect survey	Other	Multiple methods involving aerial strip transect survey using photographs and thermal imaging, with substantial modeling including spatial regression, species misclassification, and probability of detection.	Conn et al. 2014	Conn, P. B., J. M. Ver Hoef, B. T. McClintock, E. E. Moreland, J. M. London, M. F. Cameron, S. P. Dahle, and P. L. Boveng. 2014. Estimating multispecies abundance using automated detection systems: ice-associated seals in the Bering Sea. Methods Ecol. Evol. 5:1280-1293. DOI: dx.doi.org/10.1111/2041-210X.12127 .
Pinnipeds- Phocids	Phoca vitulina	Harbor Seal	Aleutian Islands	All-age haul out count (from any platform)		Haul-out correction using telemetry data	Boveng et al. 2019	Boveng, P. L., J. M. London, J. M. Ver Hoef, J. K. Jansen, and S. Hardy. 2019. Abundance and trend of harbor seals in Alaska, 2004-2018. Memorandum to the Record. Available from Marine Mammal Laboratory, AFSC, NMFS, 7600 Sand Point Way NE, Seattle, WA 98115.
Pinnipeds- Phocids	Phoca vitulina	Harbor Seal	Bristol Bay	All-age haul out count (from any platform)		Haul-out correction using telemetry data	Boveng et al. 2019	Boveng, P. L., J. M. London, J. M. Ver Hoef, J. K. Jansen, and S. Hardy. 2019. Abundance and trend of harbor seals in Alaska, 2004-2018. Memorandum to the Record. Available from Marine Mammal Laboratory, AFSC, NMFS, 7600 Sand Point Way NE, Seattle, WA 98115.
Pinnipeds- Phocids	Phoca vitulina	Harbor Seal	Clarence Strait	All-age haul out count (from any platform)		Haul-out correction using telemetry data	Boveng et al. 2019	Boveng, P. L., J. M. London, J. M. Ver Hoef, J. K. Jansen, and S. Hardy. 2019. Abundance and trend of harbor seals in Alaska, 2004-2018. Memorandum to the Record. Available from Marine Mammal Laboratory, AFSC, NMFS, 7600 Sand Point Way NE, Seattle, WA 98115.
Pinnipeds- Phocids	Phoca vitulina	Harbor Seal	Cook Inlet/Shelikof Strait	All-age haul out count (from any platform)		Haul-out correction using telemetry data	Boveng et al. 2019	Boveng, P. L., J. M. London, J. M. Ver Hoef, J. K. Jansen, and S. Hardy. 2019. Abundance and trend of harbor seals in Alaska, 2004-2018. Memorandum to the Record. Available from Marine Mammal Laboratory, AFSC, NMFS, 7600 Sand Point Way NE, Seattle, WA 98115.
Pinnipeds- Phocids	Phoca vitulina	Harbor Seal	Dixon/Cape Decision	All-age haul out count (from any platform)		Haul-out correction using telemetry data	Boveng et al. 2019	Boveng, P. L., J. M. London, J. M. Ver Hoef, J. K. Jansen, and S. Hardy. 2019. Abundance and trend of harbor seals in Alaska, 2004-2018. Memorandum to the Record. Available from Marine Mammal Laboratory, AFSC, NMFS, 7600 Sand Point Way NE, Seattle, WA 98115.
Pinnipeds- Phocids	Phoca vitulina	Harbor Seal	Glacier Bay/Icy Strait	All-age haul out count (from any platform)		Haul-out correction using telemetry data	Boveng et al. 2019	Boveng, P. L., J. M. London, J. M. Ver Hoef, J. K. Jansen, and S. Hardy. 2019. Abundance and trend of harbor seals in Alaska, 2004-2018. Memorandum to the Record. Available from Marine Mammal Laboratory, AFSC, NMFS, 7600 Sand Point Way NE, Seattle, WA 98115.
Pinnipeds- Phocids	Phoca vitulina	Harbor Seal	Lynn Canal/Stephens Passage	All-age haul out count (from any platform)		Haul-out correction using telemetry data	Boveng et al. 2019	Boveng, P. L., J. M. London, J. M. Ver Hoef, J. K. Jansen, and S. Hardy. 2019. Abundance and trend of harbor seals in Alaska, 2004-2018. Memorandum to the Record. Available from Marine Mammal Laboratory, AFSC, NMFS, 7600 Sand Point Way NE, Seattle, WA 98115.
Pinnipeds- Phocids	Phoca vitulina	Harbor Seal	Northern Kodiak	All-age haul out count (from any platform)		Haul-out correction using telemetry data	Boveng et al. 2019	Boveng, P. L., J. M. London, J. M. Ver Hoef, J. K. Jansen, and S. Hardy. 2019. Abundance and trend of harbor seals in Alaska, 2004-2018. Memorandum to the Record. Available from Marine Mammal Laboratory, AFSC, NMFS, 7600 Sand Point Way NE, Seattle, WA 98115.
Pinnipeds- Phocids	Phoca vitulina	Harbor Seal	Pribilof Islands	All-age haul out count (from any platform)		Haul-out correction using telemetry data	Boveng et al. 2019	Boveng, P. L., J. M. London, J. M. Ver Hoef, J. K. Jansen, and S. Hardy. 2019. Abundance and trend of harbor seals in Alaska, 2004-2018. Memorandum to the Record. Available from Marine Mammal Laboratory, AFSC, NMFS, 7600 Sand Point Way NE, Seattle, WA 98115.
Pinnipeds- Phocids	Phoca vitulina	Harbor Seal	Prince William Sound	All-age haul out count (from any platform)		Haul-out correction using telemetry data	Boveng et al. 2019	Boveng, P. L., J. M. London, J. M. Ver Hoef, J. K. Jansen, and S. Hardy. 2019. Abundance and trend of harbor seals in Alaska, 2004-2018. Memorandum to the Record. Available from Marine Mammal Laboratory, AFSC, NMFS, 7600 Sand Point Way NE, Seattle, WA 98115.
Pinnipeds- Phocids	Phoca vitulina	Harbor Seal	Sitka/Chatham Strait	All-age haul out count (from any platform)		Haul-out correction using telemetry data	Boveng et al. 2019	Boveng, P. L., J. M. London, J. M. Ver Hoef, J. K. Jansen, and S. Hardy. 2019. Abundance and trend of harbor seals in Alaska, 2004-2018. Memorandum to the Record. Available from Marine Mammal Laboratory, AFSC, NMFS, 7600 Sand Point Way NE, Seattle, WA 98115.
Pinnipeds- Phocids	Phoca vitulina	Harbor Seal	Southern Kodiak	All-age haul out count (from any platform)		Haul-out correction using telemetry data	Boveng et al. 2019	Boveng, P. L., J. M. London, J. M. Ver Hoef, J. K. Jansen, and S. Hardy. 2019. Abundance and trend of harbor seals in Alaska, 2004-2018. Memorandum to the Record. Available from Marine Mammal Laboratory, AFSC, NMFS, 7600 Sand Point Way NE, Seattle, WA 98115.
Pinnipeds- Phocids	Phoca vitulina	Harbor seal	Western North Atlantic	All-age haul out count (from any platform)		Haul-out correction using telemetry data	Waring et al. 2015	Waring, G.T., R.A. DiGiovanni Jr, E. Josephson, S. Wood and J.R. Gilbert. 2015. 2012 population estimate for the harbor seal (Phoca vitulina concolor) in New England waters. NOAA Tech. Memo. NMFS NE-235. 15 pp.
Pinnipeds- Phocids	Phoca vitulina	Harbor Seal	California Stock	All-age haul out count (from any platform)		Haul-out correction using telemetry data	NMFS unpublished data
Pinnipeds- Phocids	Phoca vitulina	Harbor Seal	Hood Canal	All-age haul out count (from any platform)		Haul-out correction using telemetry data
Pinnipeds- Phocids	Phoca vitulina	Harbor Seal	Northern Washington Inland Waters	All-age haul out count (from any platform)		Haul-out correction using telemetry data
Pinnipeds- Phocids	Phoca vitulina	Harbor Seal	Oregon & Washington Coast Stock	All-age haul out count (from any platform)		Haul-out correction using telemetry data
Pinnipeds- Phocids	Phoca vitulina	Harbor Seal	Southern Puget Sound	All-age haul out count (from any platform)		Haul-out correction using telemetry data
Pinnipeds- Phocids	Pusa hispida hispida	Ringed Seal	Arctic Stock	Aerial line-transect survey	Other	Multiple methods involving aerial strip transect survey using photographs and thermal imaging, with substantial modeling including spatial regression, species misclassification, and probability of detection.	Conn et al. 2014	Conn, P. B., J. M. Ver Hoef, B. T. McClintock, E. E. Moreland, J. M. London, M. F. Cameron, S. P. Dahle, and P. L. Boveng. 2014. Estimating multispecies abundance using automated detection systems: ice-associated seals in the Bering Sea. Methods Ecol. Evol. 5:1280-1293. DOI: dx.doi.org/10.1111/2041-210X.12127 .
